# Supplementary material for: Endoplasmic Reticulum Stress Inducer Tunicamycin Alters Hepatic Energy Homeostasis in Mice
Source: MDPI journal article supplement (doi:10.3390/ijms18081710), 2017-08-04
Supplement: s1 [file s1]

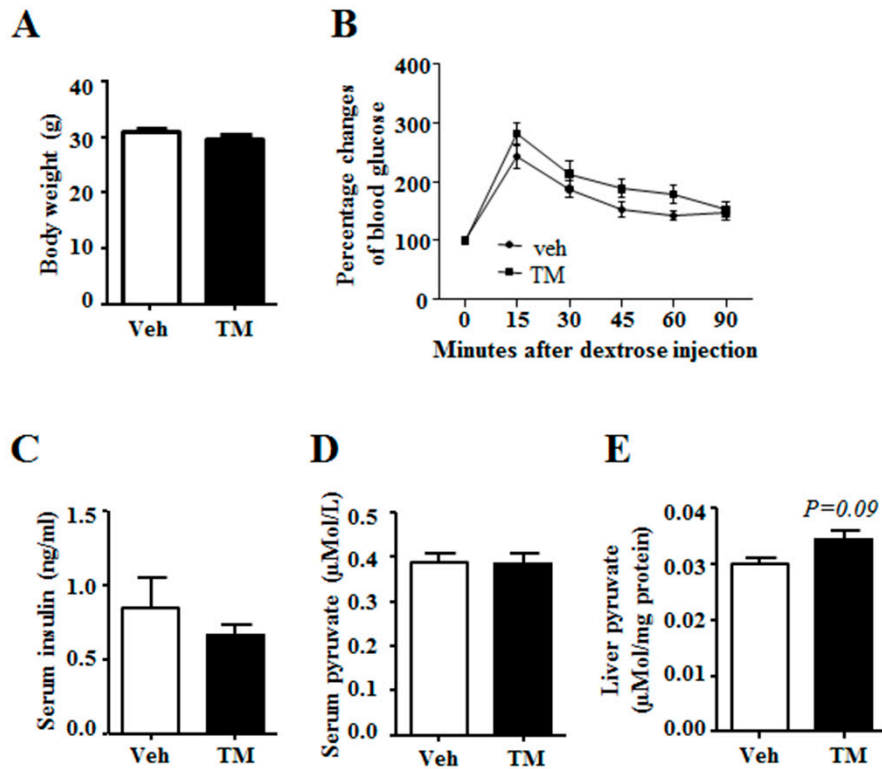

**Figure S1.** The effect of tunicamycin on body weight, GTT and serum insulin level. 7-month-old mice were intraperitoneally injected with vehicle or 1 mg/kg tunicamycin. Serum and livers were collected 24 h after injection under fed condition. N=6 per group. (A) Body weight at harvest. (B) Glucose tolerance test. 7-month-old mice were intraperitoneally injected with vehicle or 1 mg/kg tunicamycin, and then were deprived of food 8 h after injection. 24 h after injection, mice were intraperitoneally injected with 1 g/kg dextrose. Blood glucose were measured at 0, 15, 30, 45, 60 and 90 min after dextrose injection. N=6 per group. (C) Serum insulin levels at harvest. (D) Serum pyruvate levels at harvest. (E) Liver pyruvate content. Data were shown as mean  $\pm$  SEM. Veh, vehicle; TM, tunicamycin.
